# Supplementary material for: Incidence Rate and Prevalence of Systemic Sclerosis and Systemic Sclerosis-Associated Interstitial Lung Disease in Japan: Analysis Using Japanese Claims Databases
Source: PubMed Central journal article supplement — Adv Ther. 2022 Mar 22;39(5):2222–35. doi: 10.1007/s12325-022-02078-5 (PMC9056456; doi:10.1007/s12325-022-02078-5), 2022-03-22
Supplement: 12325_2022_2078_MOESM2_ESM.pdf [file 12325_2022_2078_MOESM2_ESM.pdf]

## **SUPPLEMENTARY MATERIAL**

### **Incidence Rate and Prevalence of Systemic Sclerosis and Systemic-Sclerosis-Associated Interstitial Lung Disease in Japan: Analysis Using Japanese Claims Databases**

Masataka Kuwana<sup>1</sup>, Aiko Saito<sup>2</sup>, Wataru Sakamoto<sup>2</sup>, Christina Raabe<sup>3</sup>, Kumiko Saito<sup>2</sup>

<sup>1</sup>Department of Allergy and Rheumatology, Nippon Medical School Graduate School of Medicine, Tokyo, Japan, <sup>2</sup>Nippon Boehringer Ingelheim Co., Ltd., Tokyo, Japan, <sup>3</sup>Boehringer Ingelheim International GmbH, Ingelheim am Rhein, Germany

**Corresponding author:** Masataka Kuwana

**Address:** Department of Allergy and Rheumatology, Nippon Medical School Graduate School of Medicine, 1-1-5 Sendagi, Bunkyo-ku, Tokyo 113-8602, Japan. **Email:** kuwanam@nms.ac.jp

## Supplementary Methods

### *Secondary outcomes*

For the prevalence of comorbidities at baseline and during follow-up, patients were classified as having a diagnosis if they had at least one inpatient or outpatient claim for the selected ICD-10 codes. The prevalence of comorbidities in the follow-up period was calculated at 6 and 12 months. In addition to the medical conditions listed in Supplementary Table S1, the 30 most prevalent medical conditions for each cohort were identified. For these, patients were classified as having a medical condition if they had at least one code for an inpatient or outpatient claim.

For the frequency of prescriptions of medications and medical therapies during the baseline and follow-up (6 and 12 months), the proportion of patients with at least one prescription claim of any of the medications in the drug classes listed in Supplementary Table S2 was recorded. In addition, the top 25 most prescribed medications and the top 5 medical therapies were included. The medications include those used to treat SSc, SSc-ILD or comorbidities in those patient populations (i.e. cyclophosphamide, mycophenolate mofetil, azathioprine, rituximab, methotrexate, tocilizumab, tacrolimus, ciclosporin, anti-TNF drugs, mizoribine, hydroxychloroquine, and pulmonary hypertension medication, including PGI<sub>2</sub>, ERA, PDE5I, sGC stimulants and selective prostacyclin stimulants).

The incidence rate of selected disease outcomes was evaluated in the follow-up period. Patients with corresponding selected disease outcomes at baseline were excluded. The selected disease outcomes were chosen due to their importance for understanding the burden of disease for SSc and SSc-ILD, as well as being able to be accurately captured in a claims database. Patients were defined as having a diagnosis of the specific potential adverse event if they had at least one inpatient or outpatient claim with the relevant ICD-10 code for any of the conditions in that disease category listed in Supplementary Table S3.

**Supplementary Table S1.** Selected comorbidities for SSc and SSc-ILD

| <b>Selected disease outcomes of SSc/SSc-ILD</b> | <b>ICD-10 MHLW 2013 codes/other codes</b> |
|-------------------------------------------------|-------------------------------------------|
| ILD                                             | J84.x                                     |
| Pulmonary hypertension                          | I27.x                                     |
| Epicarditis                                     | I30.x, I31.x, I32.x                       |
| Heart failure                                   | I50.x                                     |
| Myocardial fibrosis                             | I42.x, I43.x                              |
| Arrhythmia                                      | I44.x, I45.x, I47.x, I48.x, I49.x         |
| Scleroderma renal crisis                        | M34.8                                     |
| Kidney failure                                  | N17.x, N18.x, N19.x                       |
| Pseudo-ileus                                    | K56.x                                     |
| Finger ulcer, finger/toe gangrene/necrosis      | L98.x                                     |
| Respiratory failure                             | J96.x                                     |

ICD, International Classification of Diseases; ILD, interstitial lung disease; MHLW, Ministry of Health,

Labour and Welfare of Japan; SSc, systemic sclerosis; SSc-ILD, systemic sclerosis-associated

interstitial lung disease.

**Supplementary Table S2.** Prescriptions of medications/HOT for SSc/SSc-ILD and pulmonary

hypertension

| <b>Covariate</b>                                                         | <b>Comment</b>                                                                                                                                                                       |
|--------------------------------------------------------------------------|--------------------------------------------------------------------------------------------------------------------------------------------------------------------------------------|
| <b>Medication/HOT for treatment of SSc/SSc-ILD</b>                       |                                                                                                                                                                                      |
| <b>Cyclophosphamide hydrate</b>                                          |                                                                                                                                                                                      |
| <b>Mycophenolate mofetil</b>                                             |                                                                                                                                                                                      |
| <b>Azathioprine</b>                                                      |                                                                                                                                                                                      |
| <b>Rituximab</b>                                                         |                                                                                                                                                                                      |
| <b>Methotrexate</b>                                                      |                                                                                                                                                                                      |
| <b>Tocilizumab</b>                                                       |                                                                                                                                                                                      |
| <b>Tacrolimus hydrate</b>                                                |                                                                                                                                                                                      |
| <b>Ciclosporin</b>                                                       |                                                                                                                                                                                      |
| <b>Anti-TNF</b>                                                          |                                                                                                                                                                                      |
| Infliximab                                                               |                                                                                                                                                                                      |
| Etanercept                                                               |                                                                                                                                                                                      |
| Adalimumab                                                               |                                                                                                                                                                                      |
| Golimumab                                                                |                                                                                                                                                                                      |
| Certolizumab pegol                                                       |                                                                                                                                                                                      |
| Abatacept                                                                |                                                                                                                                                                                      |
| Mizoribine                                                               |                                                                                                                                                                                      |
| Hydroxychloroquine sulfate                                               |                                                                                                                                                                                      |
| <b>HOT</b>                                                               | Procedure codes: 114041610, 114042770, 114043670, 114045470, 114004910, 114005010, 114006110, 114006210, 114006310, 739210000, 739220000, 739230000, 739250000, 739260000, 739270000 |
| <b>Other medications of interest (pulmonary hypertension medication)</b> |                                                                                                                                                                                      |
| <b>PGI2</b>                                                              |                                                                                                                                                                                      |
| Epoprostenol sodium                                                      |                                                                                                                                                                                      |
| Treprostinil                                                             |                                                                                                                                                                                      |
| Beraprost sodium                                                         |                                                                                                                                                                                      |
| Iloprost                                                                 |                                                                                                                                                                                      |
| <b>ERA</b>                                                               |                                                                                                                                                                                      |
| Bosentan                                                                 |                                                                                                                                                                                      |
| Ambrisentan                                                              |                                                                                                                                                                                      |
| Macitentan                                                               |                                                                                                                                                                                      |
| <b>PDE5I</b>                                                             |                                                                                                                                                                                      |
| Sildenafil citrate                                                       |                                                                                                                                                                                      |
| Tadalafil                                                                |                                                                                                                                                                                      |
| <b>sGC stimulant</b>                                                     |                                                                                                                                                                                      |
| Riociguat                                                                |                                                                                                                                                                                      |

**Selective prostacyclin stimulant**

Selexipag

---

ERA, endothelin receptor antagonist; HOT, home oxygen therapy; PDE5I, phosphodiesterase type 5

inhibitor; PGI<sub>2</sub>, prostaglandin I<sub>2</sub>; sGC, soluble guanylate cyclase; SSc, systemic sclerosis; SSc-

ILD, systemic sclerosis-associated interstitial lung disease; TNF, tumour necrosis factor.

**Supplementary Table S3.** List of selected disease outcomes for SSc and SSc-ILD

| <b>Selected disease outcomes of SSc/SSc-ILD</b> | <b>ICD-10 MHLW 2013 codes/other codes</b>                                                                                                  |
|-------------------------------------------------|--------------------------------------------------------------------------------------------------------------------------------------------|
| Death                                           | JMDC: disenrollment from the insurance system with a cause categorized as “death”<br>MDV: I46.1, I46.9, R96, R98, R99 or discharge summary |
| ILD                                             | J84.x                                                                                                                                      |
| Pulmonary hypertension                          | I27.x                                                                                                                                      |
| Epicarditis                                     | I30.x, I31.x, I32.x                                                                                                                        |
| Heart failure                                   | I50.x                                                                                                                                      |
| Myocardial fibrosis                             | I42.x, I43.x                                                                                                                               |
| Arrhythmia                                      | I44.x, I45.x, I47.x, I48.x, I49.x                                                                                                          |
| Scleroderma renal crisis                        | M34.8                                                                                                                                      |
| Kidney failure                                  | N17.x, N18.x, N19.x                                                                                                                        |
| Pseudo-ileus                                    | K56.x                                                                                                                                      |
| Finger ulcer, finger/toe gangrene/necrosis      | L98.x                                                                                                                                      |
| Home oxygen therapy                             | Billing fee codes: 11400411, 11400371, 114045470, 114041510, 114041610                                                                     |
| Respiratory failure                             | J96.x                                                                                                                                      |

ICD, International Classification of Diseases; ILD, interstitial lung disease; JMDC, Japanese Medical Data Centre; MDV, Medical Data Vision; MHLW, Ministry of Health, Labour and Welfare of Japan; SSc, systemic sclerosis; SSc-ILD, systemic sclerosis-associated interstitial lung disease.
